# Supplementary material for: The P446L variant in GCKR associated with fasting plasma glucose and triglyceride levels exerts its effect through increased glucokinase activity in liver
Source: PubMed Central journal article supplement — Hum Mol Genet. 2009 Jul 30;18(21):4081–8. doi: 10.1093/hmg/ddp357 (PMC2758140; doi:10.1093/hmg/ddp357), 2009-07-30
Supplement: ddp357_1.pdf [file ddp357_1.pdf]

## Online Supplementary Methods

**Online Supplementary Methods 1:** P446L-variant site-directed mutagenesis primers (mismatches underlined)

|          |                                                                   |
|----------|-------------------------------------------------------------------|
| Forward: | 5' CAG ACC TTG <u>C</u> IG ATC CCT CTG AAG AAG CTC TTT CCC TCC 3' |
| Reverse: | 5' GGA GGG AAA GAG CTT CTT CAG AGG GAT <u>C</u> AG CAA GGT CTG 3' |

## Online Supplementary Methods 2:

| Primer ID                  | Sequence (5'- 3')           |
|----------------------------|-----------------------------|
| Vector <sup>†</sup> 5'_F   | GGA AGC TGT GGT ATG GCT GT  |
| Vector <sup>†</sup> 5'_R   | GGT CAG AAT GGA TTC GCT GT  |
| A_F                        | GAT GCT GAG ATC TTC CAG GAG |
| A2_F                       | GTG CCA ATC ACG GAG AAG TC  |
| A/A2_R                     | TGT CGG AAT GTT GAA CTC CA  |
| B_F                        | AGG TGG TGA CAG GTC TGT GG  |
| B_R                        | AAT GTC CGC AAG ATT TCC AG  |
| C_F                        | ATT CCG ACA AGT AGC AGA GC  |
| C_R                        | ATG AGA AAG CCA CGG ACA TC  |
| D_F                        | ATT TGA GCG AGC TCA TCA GG  |
| D_R                        | TCT TCT CTT TCA CCT GCT CCA |
| E_F                        | TGC TGA TTT CCG AGA TGT CC  |
| E_R                        | TGC TAA TCC GAA GGT CCA AC  |
| F_F                        | TGG AGC AGG TGA AAG AGA AGA |
| F_R                        | CCT GTT CCT TCT CAT GTG CA  |
| Vector <sup>†</sup> 3'_F   | ACC ACA TGT TGG ACC TTC G   |
| Vector <sup>†</sup> 3' B_F | TCC AGG TTG CAC ATG AGA AG  |
| Vector <sup>†</sup> 3'/B_R | CGC TTC TGC GTT CTG ATT TA  |

<sup>†</sup> Vector containing human GKRP coding sequence was p-FLAG CTC (Sigma Aldrich Ltd). All primers contained M13-tail attachments at start (Forward: 5'-TGT AAA ACG ACG GCC AGT-3'; Reverse: 5'-CAG GAA ACA GCT ATG ACC-3'; '\_F' denotes forward primer, '\_R' denotes reverse).

### Online Supplementary Results

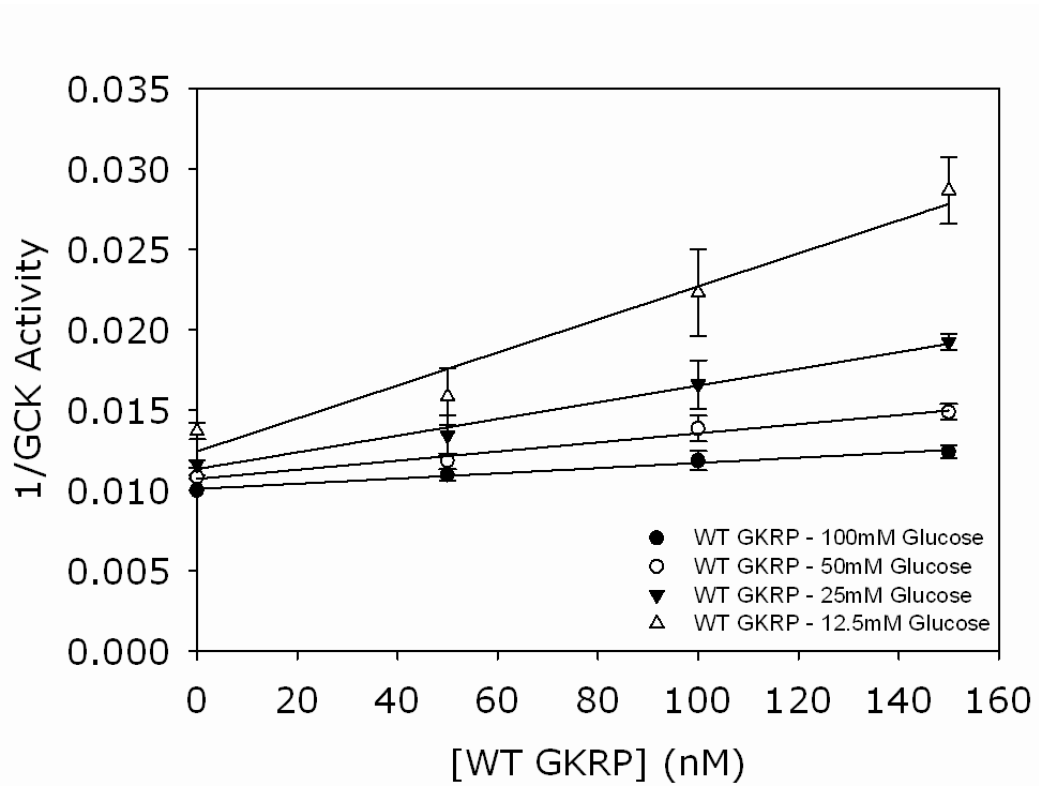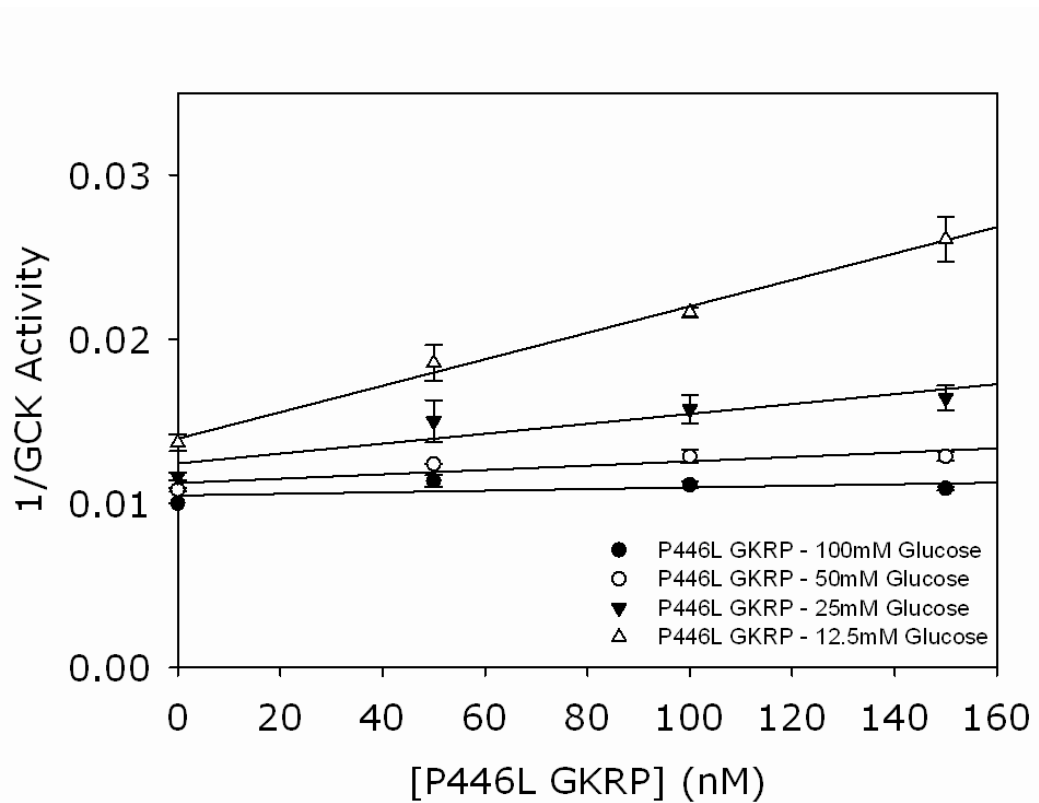

**Online Figures 1a and 1b: Dixon plots using equimolar concentrations of WT and P446L-GKRP (n=3)**

GCK activity was assayed at varying glucose concentrations (black circles=100mM, white circles = 50mM, black triangle=25mM, white triangles=12.5mM) in the presence of 0nM, 50nM, 100nM and 150nM WT and P446L-GKRP. Dixon plots of 1/GCK activity vs. [GKRP] were used to determine the inhibitor dissociation constant (' $K_i$ '), and these were found to be  $24.0 \pm 40.7$ nM for WT vs.  $23.1 \pm 40.8$ nM for P446L-GKRP, and thus was not significantly different between the two (means  $\pm$  SEM; P=1).
